# Supplementary material for: Iron Acquisition of Urinary Tract Infection Escherichia coli Involves Pathogenicity in Caenorhabditis elegans
Source: PubMed Central journal article supplement (PMC7913171; doi:10.3390/microorganisms9020310), 2021-02-02
Supplement: microorganisms-09-00310-s001.pdf [file microorganisms-09-00310-s001.pdf]

## Supplementary information

Microorganisms

Research article

### Iron acquisition of urinary tract infection *Escherichia coli* involves pathogenicity in *Caenorhabditis elegans*

(Pathogenicity of UTI *E. coli* in *C. elegans*)

Masayuki Hashimoto<sup>1,2,3\*</sup>, Yi-Fen Ma<sup>1</sup>, Sin-Tian Wang<sup>3,4</sup>, Chang-Shi Chen<sup>3,4</sup> and Ching-Hao Teng<sup>1,2,3\*</sup>

<sup>1</sup> Institute of Molecular Medicine, College of Medicine, National Cheng Kung University, Tainan, Taiwan (ROC).

<sup>2</sup> Center of Infectious Disease and Signaling Research, National Cheng Kung University, Tainan, Taiwan (ROC).

<sup>3</sup> Institute of Basic Medical Sciences, College of Medicine, National Cheng Kung University, Tainan, Taiwan (ROC)

<sup>4</sup> Department of Biochemistry and Molecular Biology, College of Medicine, National Cheng Kung University, Tainan, Taiwan (ROC).

Fig S1. The pathogenicity of *E. coli* clinical isolates in different symptoms and phylogenetic groups.

Fig S2. The number of virulence factors in clinically isolated *E. coli*.

Table S1. Primers used in this study.

Table S2. *E. coli* strains used for pathogenic solid assay

Table S3. Symptoms of clinically isolated 133 *E. coli* strains

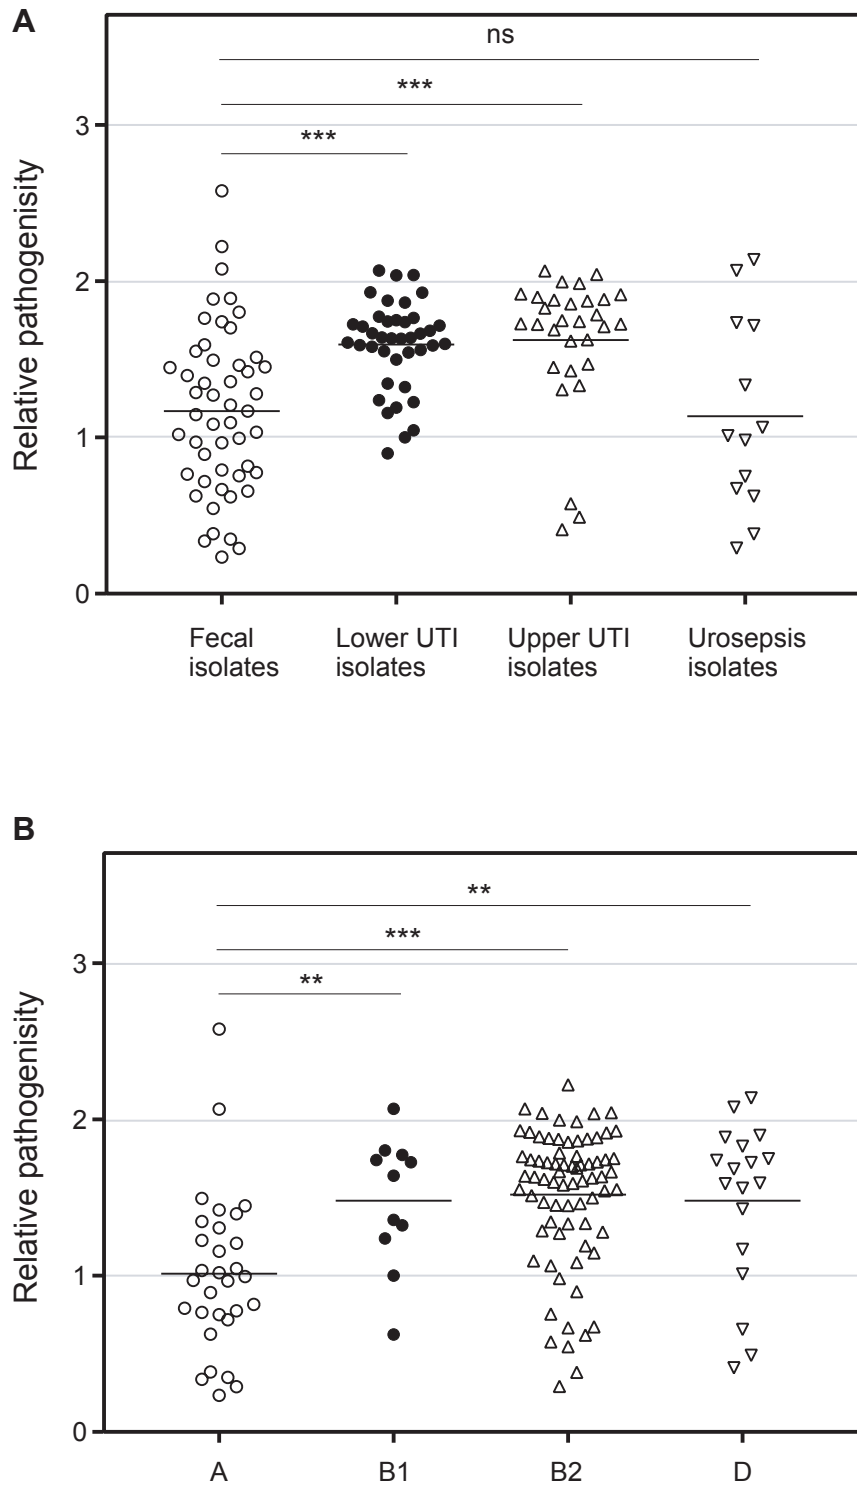

**Fig S1. The pathogenicity of *E. coli* clinical isolates in different symptoms and phylogenetic groups.** Pathogenicity (relative OD<sub>592nm</sub> value in liquid assay) of the 133 stains were plotted in different symptoms (panel A) and phylogenetic groups (panel B). The horizontal bars represented the mean values. The results were analyzed statically by Mann-Whitney U test (\*\*, p<0.01; \*\*\*, p<0.001; ns, not significant).

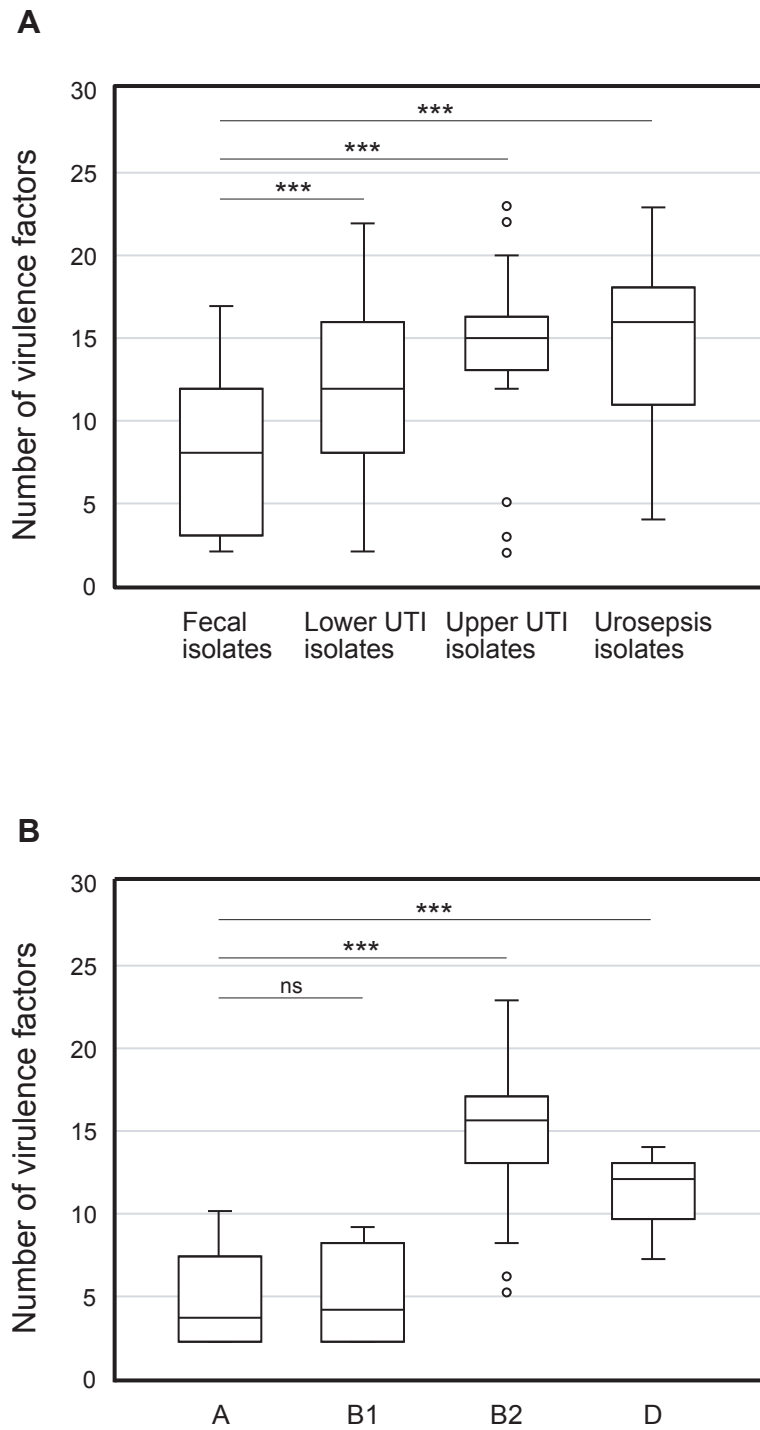

**Fig S2. Number of virulence factors in clinically isolated *E. coli*.** Box-plot indicates the number of VFs in each symptom (panel A) and in each phylogenetic group (panel B). The data was statically analyzed by Mann-Whitney U test (\*\*\*,  $p < 0.001$ ; ns, not significant different).

Table S1. Primers used in this study.

| Phylogenetic analysis |              |                                                              |  |
|-----------------------|--------------|--------------------------------------------------------------|--|
| Target                | Primer       | Sequence                                                     |  |
| arpA                  | AceK.f       | AACGCTATTGCCAGCTTGC                                          |  |
|                       | ArpA1.r      | TCTCCCATACCGTACGTA                                           |  |
| chuA                  | chuA.1b      | ATGGTACCGGACGAACCAAC                                         |  |
|                       | chuA.2       | TGCCGCCAGTACCAAGACA                                          |  |
| yjaA                  | yjaA.1b      | CAAACGTGAAGTGTCCAGGAG                                        |  |
|                       | yjaA.2b      | AATGCGTTCCTCAACCTGTG                                         |  |
| TspE4C2               | TspE4C2.1b   | CACTATTGTAAGTTCATCC                                          |  |
|                       | TspE4C2.2b   | AGTTTATCGTTCGGGTCGC                                          |  |
| arpA                  | ArpAgpE.f    | GATTCATCTTGTCAAAATATGCC                                      |  |
|                       | ArpAgpE.r    | GAAAAGAAAAGAATTCCAAGAG                                       |  |
| trpA                  | trpAgpC.1    | AGTTTTATGCCAGTGGCAG                                          |  |
|                       | trpAgpC.2    | TCTGCGCCGGTACGCCC                                            |  |
| Virulence factor      |              |                                                              |  |
| Target                | Primer       | Sequence                                                     |  |
| sit A                 | sitA-F       | CGCAGGGGGCACAACGTAT                                          |  |
|                       | sitA-R       | CCCTGTACCAGCGTACTGG                                          |  |
| cvaC                  | cvaC-F       | CACACACAAACGGGAGCTGTT                                        |  |
|                       | cvaC-R       | CTTCCCGCAGCATAGTTCAT                                         |  |
| bmaE                  | bmaE-F       | ATGGCGTAACCTGCCATGCTG                                        |  |
|                       | bmaE-R       | AGGGGGACATATAGCCCTTC                                         |  |
| fimH                  | fimH-F       | TCGAGAACGGATAAGCCGTGG                                        |  |
|                       | fimH-R       | GCAGTCACTGCCCTCCGGTA                                         |  |
| focH                  | focH-F       | ATGCGTAAATATTATCCCTC                                         |  |
|                       | focH-R       | ACCTGTCTGGATATAGAC                                           |  |
| sfaH                  | sfaH-F       | AACCGTCACCTATACCTATG                                         |  |
|                       | sfaH-R       | TGCCAGTAAATCTCCGTGT                                          |  |
| feoB                  | feoB-F       | AATTGGCGTGCATGAAGATAACTG                                     |  |
|                       | feoB-R       | AGCTGGCGACCTGATAGAACAATG                                     |  |
| iucC                  | iucC-F       | CGCCGTGGTGGGTAAG                                             |  |
|                       | iucC-R       | CAGCCGGTTCACCAAGTATCACTG                                     |  |
| vat                   | vat-F        | AGAGACGAGACTGTATTTGC                                         |  |
|                       | vat-R        | GTCAGGTCAGTAACGAGCAC                                         |  |
| picU                  | picU-F       | GGGTATTGTCCGTCCGAT                                           |  |
|                       | picU-R       | ACAACGATACCGTCTCCCG                                          |  |
| malX                  | malX-F       | GGACATCTGTACAGCGGCA                                          |  |
|                       | malX-R       | TCGCCACCAATCACAGCCGAAC                                       |  |
| fyuA                  | fyuA-F       | TGATTAAACCCCGCAGGGAA                                         |  |
|                       | fyuA-R       | CGCAGTAGGCACGATGTTGA                                         |  |
| tsh                   | tsh-F        | CCGTACACAATACGACGG                                           |  |
|                       | tsh-R        | GGATGCCCTGCAGCGT                                             |  |
| cdtB                  | cdtB-F       | GAAAATAAATGGAACACACATGTCGG                                   |  |
|                       | cdtB-R       | AAATCTCTGCAATATCCAGTTA                                       |  |
| hek                   | hek-F        | CGAATCGTTGTACGTTTCAG                                         |  |
|                       | hek-R        | TATTTATCGCCCACTCGTC                                          |  |
| irp2                  | irp2-F       | AAGGATTCGCTGTTACCGGAC                                        |  |
|                       | irp2-R       | TCGTCGGGACGCTTCTTCT                                          |  |
| iutA                  | iutA-F       | GGCTGGACATCATGGGAACCTGG                                      |  |
|                       | iutA-R       | CGTCGGGAACGGTGAATCG                                          |  |
| traT                  | traT-F       | GGTGTGGTGCATGAGCACAG                                         |  |
|                       | traT-R       | CACGGTTCAGCCATCCCTGAG                                        |  |
| draB/afa              | Afa-F        | GGCAGAGGGCCGCAACAGGC                                         |  |
|                       | Afa-R        | CCCGTAAACGCGCCAGCATCTC                                       |  |
| chuA                  | chuA-F       | ATGGTACCGGACGAACCAAC                                         |  |
|                       | chuA-R       | TGCCGCCAGTACCAAGACA                                          |  |
| ibeA                  | ibe10-F      | AGGCAGGTGTGCGCCGCGTAC                                        |  |
|                       | ibe10-R      | TGGTGTCCGGCAAACCATGC                                         |  |
| ompT                  | OMPT-F       | ATCTAGCCGAAGAAGGAGGC                                         |  |
|                       | OMPT-R       | CCCGGGTCATAGTGTTCATC                                         |  |
| iha                   | IHA-F        | CTGGCGGAGGCTCTGAGATCA                                        |  |
|                       | IHA-R        | TCCTTAAGTCCCGCGCTGA                                          |  |
| papG II               | Allele II-F  | GGGATGAGCGGGCCTTGAT                                          |  |
|                       | Allele II-R  | CGGGCCCCAAGTAACCTCG                                          |  |
| papG III              | Allele III-F | GGCCTGCAATGGATTACCTGG                                        |  |
|                       | Allele III-R | CCACCAATGACCATGCCAGAC                                        |  |
| cnf1                  | cnf1-F       | AAGATGGAGTTTCTATGCGAGGAG                                     |  |
|                       | cnf2-R       | CATTCAGAGTCTGCCCCATTATT                                      |  |
| hlyA                  | hly-F        | AACAAGGATAAGCACTGTTCTGGCT                                    |  |
|                       | hly-R        | ACCATATAAGCGGTATTCCTGCA                                      |  |
| sat                   | sat-F        | GCAGCTACCGCAATAGGAGGT                                        |  |
|                       | sat-R        | CATTCAGAGTACCGGGCCTA                                         |  |
| ireA                  | IRE-F        | GATGACTCAGCCACGGGTAA                                         |  |
|                       | IRE-R        | CCAGGACTCACCTCAGCAAT                                         |  |
| iroN                  | IRONEC-F     | AAGTCAAGCAGGGTTGCCCG                                         |  |
|                       | IRONEC-R     | GACGCCGACATTAAGACGCAG                                        |  |
| usp                   | usp-F        | ACATTACGGCAAGCCTCAG                                          |  |
|                       | usp-R        | AGCGAGTTCCTGGTGAAGC                                          |  |
| Mutant construction   |              |                                                              |  |
| Target                | Primer       | Sequence                                                     |  |
|                       | chuA-P1      | GAGAATCGCTATGTCACGTCGCCAATTTACCTCGTTCGCTGTGTAGGCTGGAGCTGCTTC |  |
|                       | chuA-P2      | TAACTCAGAAAATTTTCCGTTACGACATCCTGTGGGAATGGGAATTAGCCATGGTCC    |  |
|                       | fyuA-P1      | GGACTCAACAATGAAAATGACACGGCTTTATCCTCTGGGTAGGCTGGAGCTGCTTC     |  |
|                       | fyuA-P2      | ATAATCAGAAGAAATCAATTCGGTATGTATACCGGGTATGGGAATTAGCCATGGTCC    |  |
|                       | 165-1        | AGCAAAAGGTGGTGGATCGC                                         |  |
|                       | 165-2        | GAGAGCACTGTCCAGACGAG                                         |  |

Table S2. E. coli strains used for pathogenic solid assay

| Strain        | Genotype                                                                | Source           |
|---------------|-------------------------------------------------------------------------|------------------|
| E. coli UT189 | wold type                                                               | Laboratory stock |
| MH819         | E. coli UT189 $\Delta$ chuA::Km                                         | This study       |
| MH820         | E. coli UT189 $\Delta$ fyuA::Cm                                         | This study       |
| MH822         | E. coli UT189 $\Delta$ entA::Km                                         | This study       |
| MH821         | E. coli UT189 $\Delta$ chuA::scar $\Delta$ fyuA::scar                   | This study       |
| MH823         | E. coli UT189 $\Delta$ chuA::scar $\Delta$ fyuA::scar $\Delta$ entA::Km | This study       |

**Table S3. Symptoms of clinically isolated 133 *E. coli* strains**

| Symptoms           | Number of strains |
|--------------------|-------------------|
| Fecal isolates     | 50 <sup>a</sup>   |
| Lower UTI isolates | 40 <sup>b</sup>   |
| Upper UTI isolates | 30                |
| Urosepsis          | 13 <sup>c</sup>   |

a, including K-12 MG1655

b, including UTI89

c, including CFT073
